# Supplementary material
Source: HighWire-hosted journal article supplement (https://rmdopen.bmj.com/content/4/2/e000762)
Supplement: inline-supplementary-material-1 [file inline-supplementary-material-1.docx]

## **Supplementary table S1**

| **Table S1: Data sources** | |
| --- | --- |
| **National Swedish registers** | **Content** |
| Swedish Rheumatology Quality Register | Treatment and follow-up data on rheumatic diseases in Sweden. The coverage for spondyloarthritis patients treated with biologics is around 86%. |
| Patient register, inpatient care | Started in 1964 and contains morbidity and administrative data on all inpatient care, with diagnoses registered at discharge as ICD-codes. Almost 100% coverage. |
| Patient register, outpatient care | Started in 2001 and contains outpatient visits in specialized care, registered as ICD-codes. Coverage around 80% in specialized (non-primary) care. |
| Prescribed drugs register | Started in July 2005 and registers all prescription drugs dispensed at a pharmacy. |
| Cancer register | Started in 1958. Records all malignant and some benign tumours, including haematological malignancies. |
| LISA-register | Initiated in the mid-1990s collecting data on occupation, education, income, sick leave and other similar information. |
| Population register | Demographic data on the Swedish population. |
